# Supplementary material for: Optical and surface band bending mediated fluorescence sensing properties of MoS2 quantum dots
Source: Royal Society of Chemistry journal article supplement (doi:10.1039/c6ra21157g), 2016-01-01
Supplement: c6ra21157g1.pdf [file c6ra21157g1.pdf]

# Optical and surface band bending mediated fluorescence sensing properties of MoS<sub>2</sub> quantum dots

S. Hariharan, B.Karthikeyan\*

Nanophotonics Laboratory, Department of Physics, National Institute of Technology,  
Tiruchirappalli 620 015, India

## Supporting Information

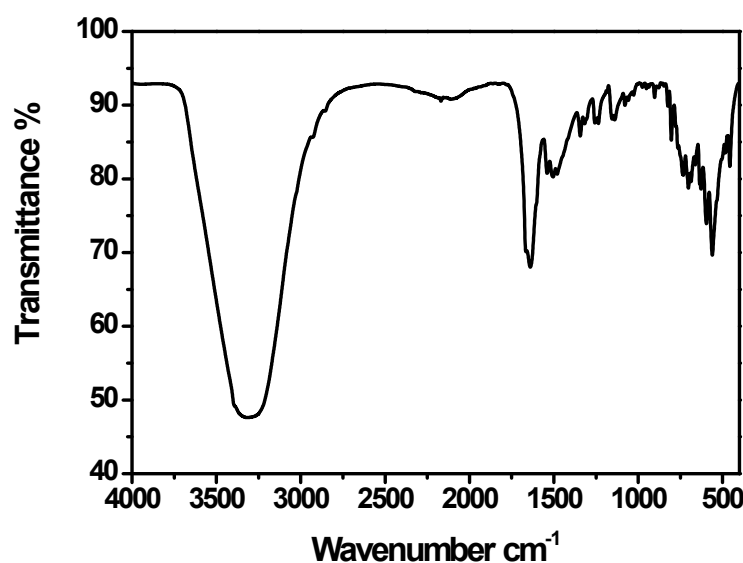

*Figure S1: FTIR spectrum of prepared MoS<sub>2</sub> quantum dots.*

Figure S1 depicts the FTIR spectrum of the prepared MoS<sub>2</sub> quantum dots. A characteristic peak found at 480 cm<sup>-1</sup> is attributed to the Mo-S vibrations. The bands observed around 581, 1112 and 1397 cm<sup>-1</sup> are assigned to the sulfate vibrations. The peaks around 1572

and  $1637\text{ cm}^{-1}$  are assigned to the N-H in-plane stretching vibration and N-H bending vibrations respectively. The broad band around  $3315\text{ cm}^{-1}$  is attributed to the N-H stretching vibrations.

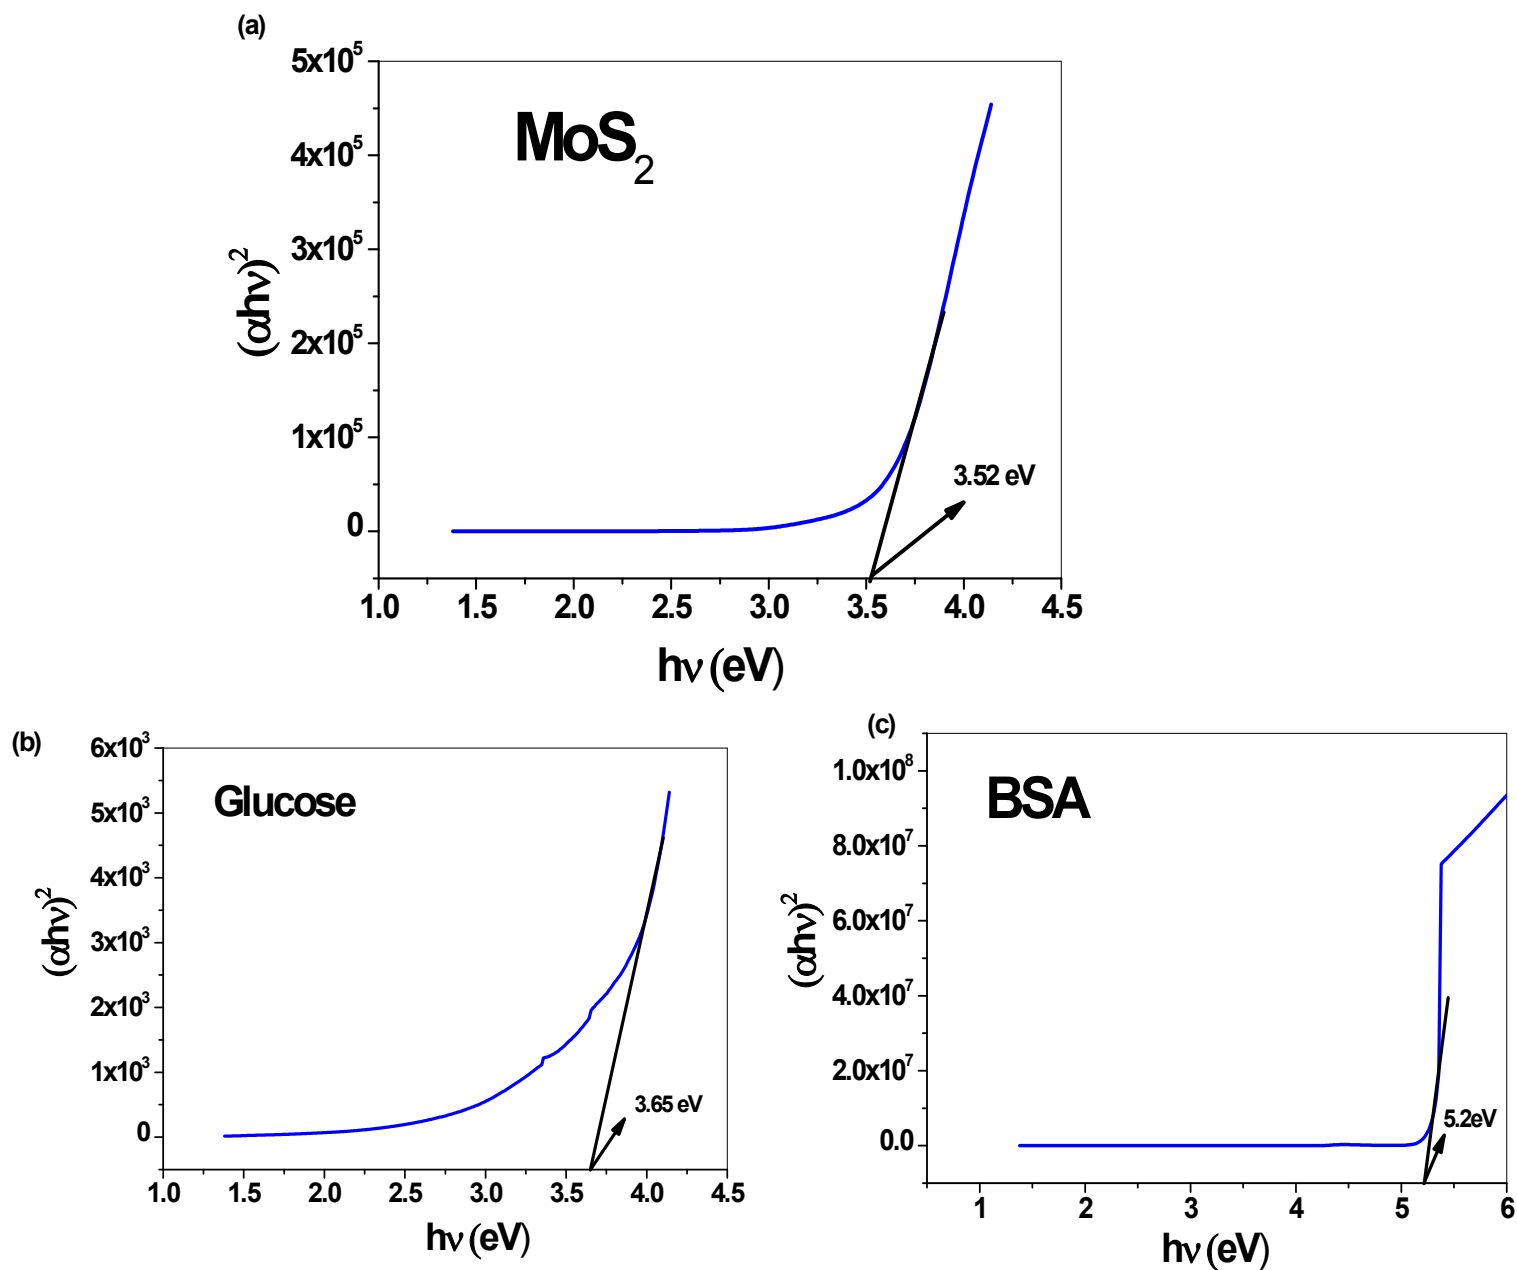

Figure S2:  $(\alpha h\nu)^2$  vs  $h\nu$  plots of (a) MoS<sub>2</sub> (b) glucose and (c) BSA

From the  $(\alpha h\nu)^2$  vs  $h\nu$  plots, the direct band gap of MoS<sub>2</sub> is found to be 3.52 eV which is lesser than the HOMO-LUMO gap of glucose (3.65 eV) and BSA ( 5.2 eV). It supports that the electron transfer is possible only from glucose and BSA to MoS<sub>2</sub>.
